1        **A Nature-based solution in practice: ecological and economic modelling**  
2        **shows pollinators outperform agrochemicals in oilseed crop production**

3  
4        Rui Catarino<sup>1</sup>, Vincent Bretagnolle<sup>1,2\*</sup>, Thomas Perrot<sup>1</sup>, Fabien Vialloux<sup>1</sup> & Sabrina Gaba<sup>1,2,3\*</sup>

5  
6        <sup>1</sup> Centre d'Etudes Biologiques de Chizé, UMR 7372, CNRS & Univ. La Rochelle, F-79360 Villiers-en-  
7 Bois, France

8        <sup>2</sup> LTSER « Zone Atelier Plaine & Val de Sèvre », F-79360 Villiers-en-Bois, France

9        <sup>3</sup> USC 1339, Centre d'Etudes Biologiques de Chizé, INRA, F-79360 Villiers-en-Bois, France

10

11

12        \* These authors contributed equally.

13

14        **Co-authors emails:** Rui Catarino (rui.catarino@cebc.cnrs.fr), Vincent Bretagnolle  
15 (vincent.bretagnolle@cebc.cnrs.fr), Thomas Perrot (thomas.perrot@cebc.cnrs.fr), Fabien Vialloux  
16 (fabien.vialloux@cebc.cnrs.fr), Sabrina Gaba (sabrina.gaba@inra.fr)

17

18        **Short running title:** Pollinators outpace agrochemicals in OSR

19

20        **Key words:** Agroecology, ecosystem services, herbicides, honey bees, insecticides, oilseed rape,  
21 pollination

22

23        **Corresponding author**

24        Dr. Sabrina Gaba

25        Centre d'Etudes Biologiques de Chizé,

26        UMR 7372 CNRS Univ. La Rochelle & USC 1339 INRA,

27        79360 Villiers-en-Bois, France

28        Tel: +33549099601

29        Email: [sabrina.gaba@inra.fr](mailto:sabrina.gaba@inra.fr)

30 **ABSTRAT**

31

32 Nature-based agriculture, reducing dependency on chemical inputs, requires using ecological principles  
33 for sustainable agro-ecosystems, balancing ecology, economics and social justice. There is growing  
34 evidence that pollinator-dependent crops with high insect pollination service can give higher yields.  
35 However, the interacting effects between insect pollination and agricultural inputs on crop yields and  
36 farm economics remain to be established to reconcile food production with biodiversity conservation.  
37 We investigated the effects of insect pollination and agricultural inputs on oilseed rape (*Brassica napus*  
38 L.). We show that not only yield but also gross margins are 16-40% higher in fields with higher  
39 pollinator abundance than in fields with reduced pollinator abundance. This effect is however strongly  
40 reduced by pesticides use. Higher yields may be achieved by either increasing agrochemicals (reducing  
41 pests) or increasing bee abundance, but crop economic returns was only increased by the latter, because  
42 pesticides did not increase yields while their costs reduced gross margins.

## 43 INTRODUCTION

44 Achieving world food production to meet the demands of a growing population while minimizing  
45 environmental impacts is a major challenge [1]. Modern agriculture may be at a tipping point, with  
46 nature's supporting mechanisms failing [2] and artificial inputs such as fertilizers and pesticides being  
47 either ineffective or used inefficiently [3,4]. There is also growing recognition that ecosystem service  
48 degradation is not only an environmental problem but has huge economic consequences [5]. The next  
49 key challenge in western agriculture is, therefore, to stabilize crop yields while decreasing the  
50 dependence on agrochemical inputs [6]. Nature-based solutions for agriculture are a key EU research  
51 target [7] and form the basis of agro-ecology [6]. This requires using ecological principles for sustainable  
52 agro-ecosystems, balancing ecology, economics and social justice [8]. Sustainable agro-ecology relies  
53 on maximizing the replacement of agro-chemicals by natural capital and ecosystem functions, while  
54 minimizing the reduction in yield and increasing farm profitability.

55 Insect pollination is a key intermediate ecosystem service as a third of human food production  
56 benefits directly or indirectly from it [9]. However, in recent years, the abundance and diversity of insect  
57 pollinators have been declining worldwide, affecting pollination services [10,11]. At the same time, the  
58 cultivated area of oilseed rape (OSR, *Brassica napus* L.) is rapidly increasing, driven by increasing  
59 demand, so that OSR production may become limited by pollinator abundance such as honeybees [12].  
60 Pesticides are used in large quantities for intensive farming to mitigate the direct impact of pests or  
61 weeds on OSR yield [13–15], but these pesticides, and especially insecticides, can increase the mortality  
62 rates of pollinators [16] and reduce their efficiency [17–19]. Herbicide, by modifying weeds abundance  
63 in crops may positively [20] or negatively [21] also influence pollinator abundance.

64 OSR is considered to be both self-pollinated and wind-pollinated [22]. Though, insect pollination  
65 can increase the yield of winter OSR by 20-35% [23,24], with a possible benefit of €2.6 M.year<sup>-1</sup> for the  
66 whole of Ireland [25]. Estimating the extent to which OSR production relies on insects for pollination  
67 services is, however, less easy than usually thought [26,27]. Firstly, measuring pollination services by  
68 quantifying the reduction in yield when pollinators are excluded, also excludes other ecosystem services  
69 and may stress the plants [26]. Secondly, the benefits of a pollination service in terms of increased yield  
70 is often assumed to be independent of the level of inputs [26,28]. However, crop production is a complex

71 multi-scale system [29,30] which involves inputs that may interact with abiotic factors (e.g. soil  
72 properties), the biodiversity, and the services they provide. Recent studies have demonstrated that the  
73 value of insect pollination depends on the soil fertility [30,31], field size [32] and farming practices such  
74 as the selection of cultivars [22] and pest control [33]. When pollinators are limited, farmers can change  
75 their practices to compensate for poor pollination by, for example, increasing fertilizer applications [34].  
76 Thirdly, pollinator abundance and pollination efficiency vary with the composition of the surrounding  
77 landscape [35]. Landscapes with large quantity of pollinator-friendly areas, such as semi-natural habitats  
78 (SNH: woodlands, meadows) which can increase the abundance of pollinators [28] or attract pollinators  
79 away from the OSR fields [36]. Recent research [37] has showed that a higher proportion of OSR in the  
80 surrounding landscape may also decrease insect pollination by spatial dilution of the pollinator  
81 population. Moreover, pollinator abundance decreases with distance from the edge of an OSR field [38]  
82 especially for wild pollinators with limited range [39]. Overall, the extent to which pollinators and other  
83 farming practices interact to increase or limit OSR yields remains little known [29,30].

84 Although OSR is perhaps the most well studied crop regarding the interaction between pollination  
85 services and farmers practices, very few studies have been performed under real working farm  
86 conditions (but see for exception Lindström studies in Sweden [40,41] and Perrot et al. (2018)[24]).  
87 Moreover, studies generally investigated the effect of a single farming practice on the contribution of  
88 pollinators, such as fertilizer inputs [30,34], insecticide use [41], pest exclusion [33] or cultivar type  
89 [34,40]. Furthermore, the effect of interactions between pollination and farming practices on farm  
90 income (Fig. 1) have never been investigated, despite pollination being one of the most commonly  
91 assessed services. Existing studies of the economic value of pollination have been almost exclusively  
92 illustrative, with few cost-benefit analyses of the role of pollinators (review in Hanley *et al.* [42]). In our  
93 study, we address this gap by quantifying the effect of bee visitation on yields and gross margins for  
94 OSR with diverse farming practices and landscape characteristics (Fig. 1). We collected the data over  
95 six years from 294 OSR fields along landscape gradients with varying proportions of arable and semi-  
96 natural habitats (SNH), ensuring a wide variation in pollinator abundance and diversity (the pollinators  
97 were counted in the focal fields). We used linear models fitted to this large dataset to quantify the  
98 individual and combined effects of farming practices, soil quality and, bee abundance (on a subset of

99 data), on OSR yield and gross margin. We then used the model to test the effect of maximizing pest  
100 control or bee abundance on yield and gross margin. We predicted that reducing herbicide (presumably  
101 increasing weed abundance) would increase the attractiveness of the OSR field and the bee visitation  
102 rate (this assumes no competition for pollinators between higher weed abundance and OSR plants). We  
103 also predict that reducing insecticide (presumably decreasing the bee mortality rate) use would not only  
104 increase OSR fruiting success and yield, but increase the gross margin further by reducing costs. Our  
105 findings provide an important contribution to the evidence-based promotion of biodiversity as a means  
106 of increasing yield and farming profit, an essential step for the adoption of nature-based solutions.

107

## 108 **MATERIAL & METHODS**

### 109 **Study area**

110 The study took place from October 2011 to August 2016 in the LTSER “Zone Atelier Plaine &  
111 Val de Sèvre”, a long term social-ecological research site covering 450 km<sup>2</sup> [43] in central western  
112 France (46.23°N, 0.41W). It is an agricultural landscape dominated by intensive cereal production, with  
113 8-12% OSR, and average field size of 4-5 ha. The site is also used by professional or amateur beekeepers  
114 who own several hundreds of hives, though none of them contract or are paid by farmers for crop  
115 pollination. Information about crop yields and farming practices (pesticide and fertilizer use, tillage and  
116 mechanical weed control) and general information about the farm (number of crops, agricultural  
117 equipment) were collected by farm surveys after harvest. The sample comprised 142 farmers with 294  
118 OSR fields of which 273 fields were sown with hybrid OSR and 21 with pure line OSR (further details  
119 on field selection in electronic supplementary material, methods S1). The large majority of farmers (103)  
120 managed two fields (2.1±1.4 fields per farmer), and nineteen farmers managed four or more fields. The  
121 field size ranged from 0.4 ha to 28.5 ha (mean 6.9±5.0 ha). The soil type varied from very poor dry soil  
122 20 cm deep or less, to 50 cm silt, and was classified in four categories: three highly calcareous soils,  
123 with depths of 20, 30 and 40 cm, and one with red silt over limestone.

124

### 125 **Insect pollinator surveys**

126           Between 2013 and 2016, the abundance and diversity of the major groups of flower-visiting  
127 insects, including bees (Hymenoptera, Apoidea, Apiformes) and hoverflies (Diptera, Syrphidae) were  
128 surveyed [44]. A total of 85 fields (10, 19, 24 and 32 in 2013, 2014, 2015 and 2016) were sampled using  
129 both pan traps and sweep nets to get local estimates of the pollinator abundance and richness. The counts  
130 of four groups of pollinators (honeybees, bumblebees, other wild bees, and hoverflies) in each field  
131 obtained by these, and were combined to provide pollinators abundance index (further details in  
132 electronic supplementary material, Methods S2). Due to their limited effect in the study area as  
133 demonstrated in [24], hoverflies were excluded from the calculation of pollinator abundance. For each  
134 three remaining groups of pollinators and for each field, we averaged the counts for each trapping  
135 method. Then, we standardized the values using z-scores [45] across the whole sample size per trapping  
136 method. The z-scores for pan-traps corresponded to the total abundance catch per field which were  
137 centred (mean of total abundance are removed to each value of total abundance) and reduced (each total  
138 abundance value are divided by the standard deviation of total abundance). The final total abundance  
139 for each three groups of pollinators was the sum of z-scores for sweep net and pan traps counts in 2013  
140 and 2014, and for visual counts and pan traps in 2015 and 2016. This first metric was called total  
141 pollinator abundance. A second metric was further derived, since in our study area, the main bee  
142 pollinators in OSR fields are by far *Lasioglossum* spp. (a wild bee) and honeybees [24]. We thus used  
143 the sum of the reduced-scores values of these two species/genus as a bee index (electronic  
144 supplementary material, Table S1).

145

#### 146 **Farm surveys**

147           The general farm statistics obtained from the survey questionnaires during interviews are given  
148 in electronic supplementary material, Table S2. From these surveys, we derived the treatment frequency  
149 indicator (TFI) as a pesticide use indicator. TFI is a quantitative index that measures the intensity of  
150 applications as the number of dose applied per unit of cropped area in relation to the recommended  
151 dosage per crop type [46]. TFI reflects the recommended dose necessary to control pests and can be  
152 broken down per group of pesticides (herbicide, insecticide and fungicide) or aggregated for all  
153 pesticides. TFI per hectare is expressed as:

$$TFI_k = \sum_{j=1}^k \left( \sum_{i=1}^n \frac{D_i \cdot S_i}{Dh_j \cdot S_t} \right)$$

154 where  $D_i$  is the dose in application  $i$ ,  $Dh_j$  is the national approved dose for pesticide  $j$ , and  $S_i$  is the  
155 surface area treated in application  $i$  and  $S_t$  is the total field area [47]. This includes all the pesticide  
156 treatments applied in a given crop field. The recommended dose is defined for each combination of  
157 pesticide product and crop type. We computed for each field a global TFI and a TFI for each group of  
158 pesticides. A TFI equal to one, e.g. for herbicides, means that the farmer either: (i) applied a single  
159 product at the recommended dose in the entire field; (ii) applied two products at half of their  
160 recommended dose; or (iii) a single product applied twice at the recommended dose on only half of the  
161 surface of the field. For our sample of farms, the global TFI varied from 0.6 to 11.3 (mean:  $4.9 \pm 1.8$ ,  
162  $N=294$ ).

163 Since the inorganic nitrogen in mineral fertilizers is rapidly available to plants, the quantity of  
164 nitrogen used was directly calculated from the fertilizer composition and the quantity applied. However,  
165 organic compounds with nitrogen are relatively stable and must be mineralized to be available to the  
166 crops. The quantity of nitrogen mineralized in organic fertilizers was calculated using the method  
167 described by Jeuffroy and Recous [48].

168

## 169 **Statistical analyses**

170 Using the complete dataset (294 fields), we first analysed with a linear mixed model (LMM), the  
171 effects of farming practices (fertilizer and pesticides) and soil type (four class) on both yield and gross  
172 margin (GM; for further details on gross margins calculation, see electronic supplementary material,  
173 Methods S3) accounting for direct and interacting effects. We included interactions between practices  
174 (fertilizers) and soil types to account for farmers adapting their practices to soil quality. We also included  
175 Farmer ID as a random factor to account for varying number of fields per farmer, and present results in  
176 the proportion of variance explained by the fixed factors (marginal  $R^2$ ,  $R^2_m$ ), and the one explained by  
177 both the fixed and random factors (conditional  $R^2$ ,  $R^2_c$ ). To estimate the effect of pollinators, we then  
178 added bee abundance index and its two-way interactions with the farming practices. The effect of  
179 pollinators was studied only for years 2013 to 2016 with a sample size of 85 fields, as bees were not

180 sampled before 2013. In this dataset, since 80% of farmers managed only one field, Farmer ID was not  
181 included as a random factor. Finally, we added field size and landscape metrics to the model. The  
182 landscape was modelled as the percentages of OSR and SNH (meadows, woodland and hedges,  
183 considering a hedge to have a width of two meters), outside the focal field at eight buffer sizes, from  
184 250m to 2000m. Buffer distance was measured from the focal field edge, not the centroid, because the  
185 field size was highly variable. The model with buffer width with the highest explanatory power was kept  
186 (see below). All models were checked for normality and homoscedasticity. Collinearity was low in all  
187 models, with variance inflation factors (VIF) less than 3.1.

188 At each step, we selected the linear models and linear mixed models with the highest explanatory  
189 power, using a multi-model Akaike information criterion method and model averaging using the  
190 “dredge” function in MuMin R package [49]. The model averaging approach provides an estimate of  
191 the uncertainty of each coefficient [50]. We kept all models with AIC less than 2.0 greater than the best  
192 model [50]. The average model was considered to be the best explanatory model. Consequently,  
193 although similar set of variables were included in the models for yield and gross margin, after the model  
194 selection procedure, different set of variables can be retained. The weight of a parameter was calculated  
195 as the sum of the Akaike weights over all of the models in which the parameter was retained [50]. The  
196 total amount of variance explained ( $R^2$ ) was calculated using the model with the smallest AIC among  
197 all models in which the parameter was retained. Farming practices were also standardized per year using  
198 z-scores. This transformation does not constrain the variability found in the raw data and allows focusing  
199 on each effect independently of the year effect.

200 Based on our empirical data, we finally explored whether the losses due to reducing the use of  
201 herbicides and insecticides could be balanced by an increase in the yield and/or GM due to an increase  
202 in bee abundance. We choose to analyse the sum of herbicides, insecticides and fungicides, combining  
203 them into a single pesticide TFI, i.e. the sum of each individual TFI. We then used a LM including  
204 pesticide TFI, bee abundance and the interaction between bee abundance and pesticide TFI. Annual  
205 variation in yield was taken into account by subtracting the average yield of the studied year. We varied  
206 the TFI for pesticides and the bee abundance within the observed range of values assuming that the  
207 pressure from pests was not increased by the reduction in insecticide. To test the robustness of this



208 assumption, we assessed the relationship between OSR yield, insecticide use and insect pest abundance,  
209 using a LM fitted to a third dataset with 74 data points over three years (18 in 2014, 24 in 2015 and 32  
210 in 2016) for which insect pest abundances were available. The effect of pesticides on insect pest  
211 abundance was tested using a linear model with insecticides, herbicides and fungicides as explanatory  
212 variables. Pest abundance was obtained from the pan trap surveys which give good predictions of pest  
213 abundance in OSR inflorescences [51] (see electronic supplementary material, Methods S4 and Table  
214 S3).

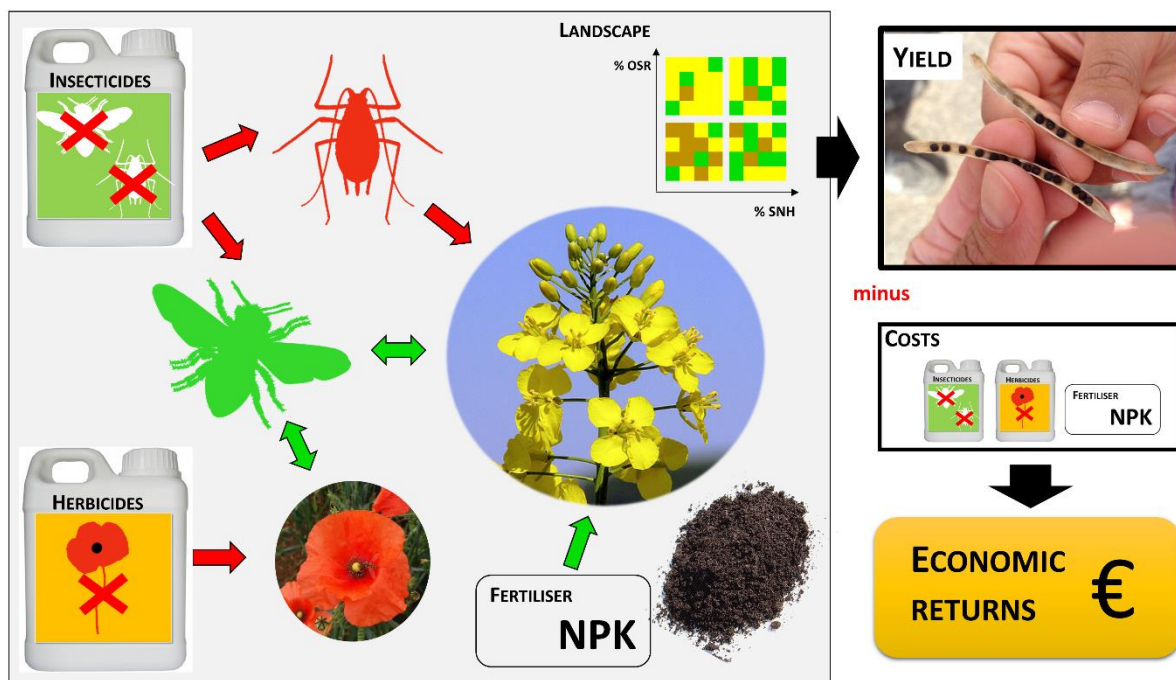

215  
216 **Figure 1:** Schematic representation of the relationships between soil type, agricultural practices, bees, landscapes and their  
217 effect on yield and economic returns. Red arrows indicate negative interactions, whereas green ones show positive ones.

## 218 **RESULTS**

### 219 **Effect of farming practices on OSR yields and gross margins**

220 Overall, OSR crop yield averaged  $3.1 \text{ t}\cdot\text{ha}^{-1}$  ( $\pm 0.6$ , range 1.6:5.4,  $n=294$ ), red soils showing a  
221 significantly higher yield (c. 16% on average) than the other soil types. We tested whether farming  
222 practices (fertilizer and pesticide use), soil type and the two-way interactions between fertilizer and soil  
223 type affected yield using the complete dataset. The best model (explaining  $R^2_m = 13.98\%$  of the variance  
224 and  $R^2_c = 46.87\%$ ) showed that fungicide significantly increased yield (Table 1a). For gross margin  
225 (GM), all inputs were kept in the selected model, as well as all interactions between fertilizer and the  
226 soil type (explaining  $R^2_m=36.37\%$  of the variance ( $R^2_c=48.72\%$ ), Table 1b). The practices most affecting

227 yield and GM were quite different. But most importantly, except phosphorus, all inputs kept in the final  
228 model negatively affected GM (Table 1b), including the significant negative effect of nitrogen and  
229 herbicides. The soil type and its interaction with nitrogen also had significant effects, with more effect  
230 for red soils. Keeping only the variables selected for the yield model (Table 1a) resulted in a model with  
231 slightly poorer fit and fewer explanatory variables ( $\Delta AIC=163.17$ ,  $R^2_m=14.97\%$  and  $R^2_c=40.96\%$ ). Our  
232 results further suggested that neither insecticides nor herbicides had a direct significant effect on yield  
233 (Figs. 2a, b), but both strongly reduced gross margins (Figs. 2c, d).

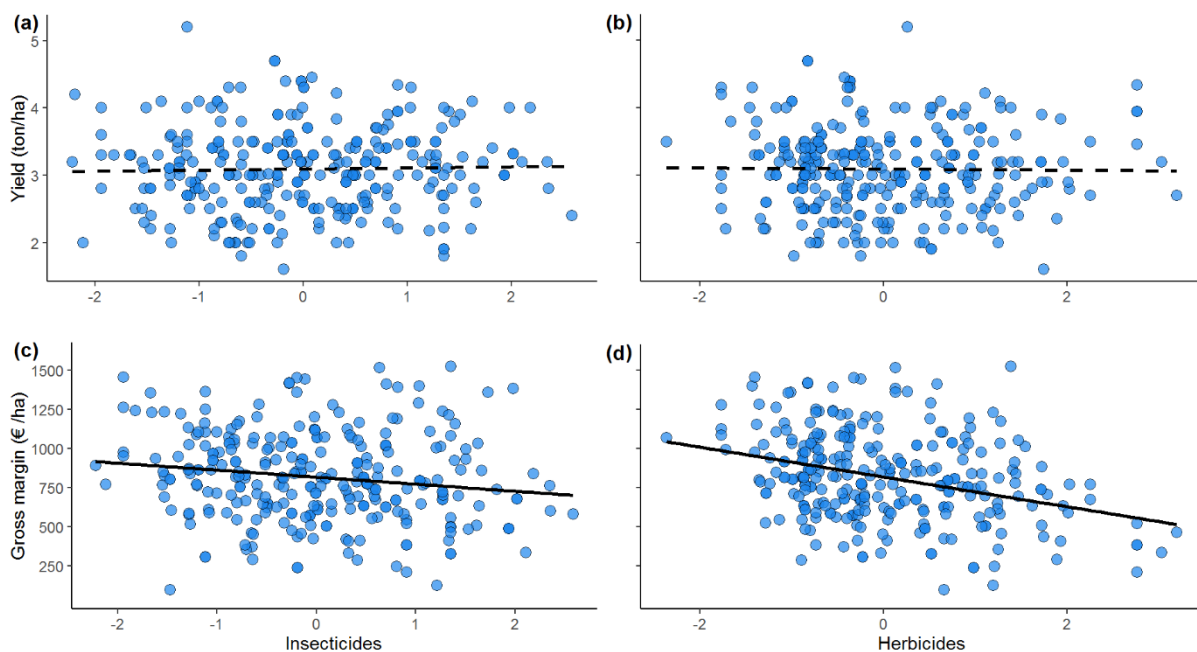

234  
235 **Figure 2:** Relationship between insecticides, herbicides on yield (panels a and b) and gross margins (panels c and  
236 d), N=294. Solid lines show significant regressions and dashed lines non-significant regressions. Values for both  
237 herbicides and insecticides were centred/reduced.

### 238 Effect of bees on yield and gross margin

239 For yield, adding *Lasioglossum* spp. plus honeybees (i.e., the bee index) improved the model  
240 (Table 2). OSR yield increased with bees abundance ( $p$ -value=0.026, Table 2a), with a significant  
241 negative interaction between insecticides and bees ( $p$ -value=0.039, Table 2a). The model explained  
242 20.6% of the variance ( $p$ -value<0.01, Table 2a). Including bees removed the soil type effects from the  
243 previous model. Although these eliminations might be due to the smaller sample size (85 vs. 294), the  
244 removal of the soil type was probably due to the higher bee abundance for red soils (about 47% higher,  
245 although the difference was not significant, data not shown). Bee abundance and its interaction with

246 insecticide, accounted for about 70.4% of the total variance explained in the yield. Using total pollinator  
247 abundance (i.e. including wild bees plus honeybees) did not change the general pattern (electronic  
248 supplementary material, Table S4a).

249 The larger field sizes and the presence of other OSR fields nearby may either attract bees or dilute  
250 the honeybee population, while *Lasioglossum* spp. may depend on nearby SNH. We thus tested whether  
251 including the field size, %OSR and %SNH in the surrounding landscape improved the model. The model  
252 that best fitted the data ( $R^2 = 22.1\%$ , Table 2b) had a 250 m buffer width. Within this buffer, %OSR and  
253 %SNH had a positive effect on yield, although non-significant. All other buffers resulted in lower AIC  
254 (data not shown).

255 For the GM, bee abundance was the only variable with a positive effect ( $p$ -value=0.0381, Table  
256 2c, Fig. 3a). Farming practices (potassium and herbicide) had a significantly negative effect, and also  
257 interacted with bees (Table 2c). Including %OSR and %SNH in the surrounding landscape did not  
258 change the effect of pollinators, although the %SNH had a direct significant positive effect for a 250m  
259 buffer (electronic supplementary material, Table S5).

260 For average levels of inputs, yield was  $0.31 \text{ t}\cdot\text{ha}^{-1}$  higher and gross margin was  $119 \text{ €}\cdot\text{ha}^{-1}$  (i.e.  
261 16%) higher in fields with the high than fields with the low bee abundance using 0.1-0.9 quantile (Figs.  
262 3a, c). Keeping extreme values of bee abundance (i.e., the lowest compared to the highest) yielded a  
263 much larger increase of OSR yield (Fig. 3b;  $0.77 \text{ t}\cdot\text{ha}^{-1}$ ) and GM (Fig. 3a;  $289 \text{ €}\cdot\text{ha}^{-1}$ ).

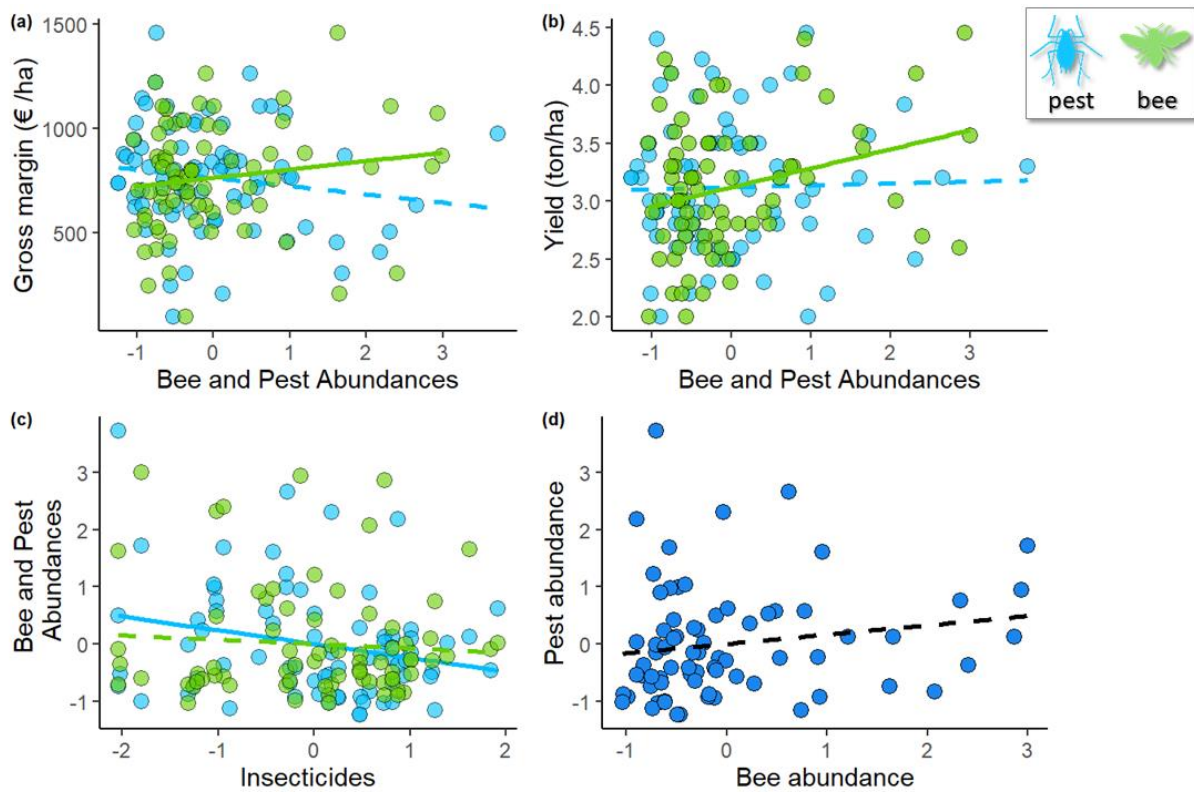

264

265 **Figure 3:** Plot a) shows the effect of pest (blue dots) and bee (green dots) abundance on gross margins; plot b)  
266 shows the effect on yield; plot c) shows the effect of insecticides on bees and pests; plot d) shows the relation  
267 between pest and bee abundances. Abundances were centered/reduced. Solid lines show significant regressions  
268 and dashed lines non-significant regressions. Bee abundance includes honeybee plus *Lasioglossum* spp

### 269 Trade-offs between pollinators, pesticides and pests to improve gross margins

270 Since bee abundance had a consistently positive effect on yield and GM, and there was a negative  
271 interaction between bee abundance and the use of pesticides, we explored whether higher yields and  
272 GM could be obtained by reducing the use of agro-chemicals to increase bee abundance and their  
273 contribution to yield. All variables kept in the yield and GM models, except bee abundance, insecticides,  
274 herbicides and fungicides were set to their mean values (electronic supplementary material, Table S2).  
275 The interactions were visualized using 3D plots with the sum of herbicide, fungicide and insecticide  
276 TFIs (hereafter TFI pesticide) on the x-axis, bee abundance on the y-axis and yield or GM on the z-axis.  
277 This revealed antagonism between pesticide use and bee abundance, with the latter having a greater  
278 positive effect when the use of pesticides was low (Fig. 4). Assuming that the pest pressure remains  
279 constant, this antagonism between pesticide use and bee abundance shows that farmers could maximize  
280 yield through two opposite strategies: maximizing either pesticide use or bee abundance (Fig. 4a). These  
281 strategies, however, had a different effect on GM which was always higher when bee abundance was

282 maximized (Fig. 4b). Additionally, although the use of insecticides reduced the abundance of insect  
283 pests ( $F_{1,70} = 5.40$ ,  $p$ -value=0.023, Fig. 3c), a higher abundance of pests would not significantly affect  
284 yield ( $F_{1,70} = 0.08$ ,  $p$ -value=0.78, Fig. 3b). On the other hand, higher abundance of bees had a strong  
285 positive effect on both yield (Fig. 3b) and GM (Fig. 3a). As bees and pests were positively related  
286 (though not significantly:  $r_s = 0.23$ ,  $p$ -value= 0.23; Fig. 3d), the increase in yield due to the higher bee  
287 abundance when insecticide use is reduced, was greater than loss of yield due to the increased abundance  
288 of pests.

289

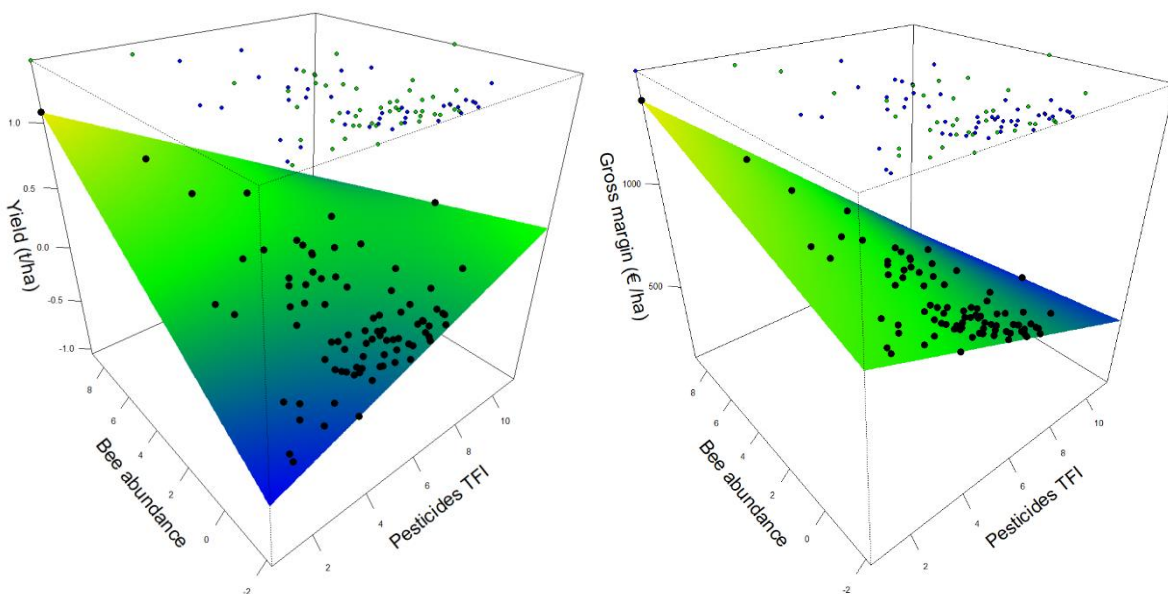

290

291 **Figure 4:** Effect of interaction between bee abundance and the combined herbicide and insecticide TFI on yield  
292 (a) and gross margins (b). The green surface shows regions where the yield or gross margin is higher and blue  
293 where it is lower. Coloured points represent the raw data points and the black ones predicted values from the  
294 model. Positive and negative differences between raw data and predicted values are indicated in blue and green.  
295 Bee abundance includes honeybee and *Lasioglossum* spp, and pesticide TFI is the sum of insecticide and herbicide  
296 TFIs. Both explanatory variables were centered/reduced before analysis.

## 297 DISCUSSION

298 Although ecological intensification appears to be a promising alternative to conventional  
299 agriculture (e.g. Pywell *et al.* [52]), there is no consensus on whether it is possible to replace  
300 agrochemicals by natural capital and ecological functions without major reductions in yields [53,54].  
301 Insect pollination has been shown to increase OSR yields both in experimental [22,34] and on-farm  
302 studies [24,40], but the effect of interactions between pollinators and agricultural practices on yield and  
303 income remain largely unknown. Though, the practical implications for farmers, as decision-makers,



304 and for policy-makers are critical [55]. Based on a very large dataset spanning four and six years, this  
305 study provides a comprehensive analysis of synergy and antagonism between farming practices and  
306 biodiversity, and their effects on yield and income.

307 Although farming practices overall accounted for about 24% of the variance of the yield, few  
308 practices showed significant positive effects. Phosphorous [56] and fungicides [57] were the only inputs  
309 with a significant positive effect on OSR yield. Phosphorus may increase OSR yield by increasing the  
310 number of pods per plant and seeds per pod [58]. Simultaneously insect pollination, was as well strong  
311 determinant of OSR yield, supporting previous experimental studies [23,24,34]. Taking into account  
312 farming practices, pollinator abundance explained 50% of the variance of the yield, increasing yields by  
313 0.77 t.ha<sup>-1</sup> from the lowest abundance to the highest. This is consistent with previous studies that found  
314 increases in yield from 0.4 to 1.0 t.ha<sup>-1</sup> [24,38]. Fertilizer, especially nitrogen, is a recognized driver of  
315 yield, but we failed to detect any direct effect of nitrogen fertilizer on OSR yield. Although surprising,  
316 the absence of an increase of yield with nitrogen input has already been reported [59,60], and other  
317 studies have even reported negative effects [61,62]. This is possibly explained by the ability of modern  
318 cultivars to achieve higher yields with lower nitrogen inputs [59]; indeed 93% of the farmers in our  
319 study used modern hybrid seed varieties. Our results suggest that, for the farms studied, OSR yield is  
320 limited by pollinators rather than nutrient availability [30].

321 Agricultural practices had little effect on yield which meant that the GM was significantly reduced  
322 by nitrogen fertilizer and herbicide applications, as their costs were not recovered in the form of higher  
323 yields. Bee abundance was positively correlated with yield, and GM was 15-40% higher with the highest  
324 abundance compared with the lowest. This increase of GM assumes that no cost were associated,  
325 especially with the presence of hives in the landscapes (i.e. honeybees were dominant pollinator here).  
326 In some region, hive rental costs are supported by the farmers. For instance, apple pollination fees are  
327 about €40 per hive [63]. Assuming the similar fees per hive for OSR pollination, GM would still be 4%-  
328 25% higher with two hives/ha. Very few experimental OSR studies have assessed the economic benefits  
329 of pollinators at the field level [26]. Accounting for average production costs per ha, Stanley *et al.* [25]  
330 estimated the effect of pollinators on yield in four experimental fields, and then extrapolated to the whole  
331 of Ireland to achieve an estimated benefit of €2.6 M.year<sup>-1</sup>. Bommarco *et al.* [23], in a pollination

332 exclusion experiment in ten fields along a landscape gradient, found a 20% increase in the market value  
333 of OSR. Our study is the first to assess the financial benefits from pollinators in real farming conditions  
334 over 85 fields located along a gradient of pollinator abundance.

335         The benefits of ecosystem services for crop yield may be affected by agricultural practices such  
336 as agrochemical inputs [30,64]. In our study, we focused on the interactions between bee pollination and  
337 pesticides. These agrochemicals increase crop yield through decreased insect pests, fungi and weed  
338 pressure. However, they can also reduce the benefits of pollination by reducing bee abundance or  
339 efficiency, and decreasing the reserves of flowers. With constant insect pest pressure, our analysis  
340 showed that higher yields may be achieved by two opposite strategies: increasing agrochemicals  
341 (reducing pests) or increasing bee abundance (increasing fruiting success, [24]). But GM was only  
342 increased by increasing bee abundance, because insecticides reduced bee abundance and neither  
343 insecticides nor herbicides increased yields while their costs reduced gross margins. This result  
344 contradicts the dominant arguments about trade-offs between food production and conservation of  
345 biodiversity ([65], but see Pywell *et al.* [52]) and shows that nature-based solution can yield to a win-  
346 win strategy.

347         There are two caveats that may limit this interpretation. Firstly, our model assumed constant insect  
348 pest and weed pressure, that is, reducing pesticides would not increase their abundances, whereas a  
349 reduction in yield may be expected when reducing pesticides [66]. We indeed found that insect pest  
350 abundance was lower in fields with high insecticide inputs than in those with low inputs. However,  
351 higher insect pest abundances did not translate into reduced yields as there was no relationship between  
352 insect pest abundance and OSR yield. It is possible that pest abundance is very low in our study region.  
353 For example, with similar trapping method and effort, more of 20 pests were caught in Germany or  
354 Estonia [67,68] while only six were caught in our site. It is also possible that OSR plants are able to  
355 overcompensate pest damage [69]. However, several recent studies in France have shown that reducing,  
356 to a certain extent, pesticides may not reduce yields, as found for herbicides in wheat [4] or for pesticides  
357 in general in arable crops [70]. Moreover, pollinators abundance strongly differs between study sites for  
358 a same crop type [71], and actually our study region has a particularly rich wild bee community, with  
359 more than 250 species [72]. The benefits thus depend on the local pollinator population, part of the

360 natural capital. Further research on the effects of variations in pollinators and farming practices on yields  
361 and profits is therefore needed in other agricultural conditions.

362 New agricultural strategies must be developed to achieve sustainable crop production and reduce  
363 dependency on chemical inputs. This study provides a clear demonstration that agro-ecology, by  
364 promoting nature-based solutions for agricultural production can be an alternative to conventional  
365 agriculture for both food production and farm income. Based on a large-scale field survey, our results  
366 therefore support a “win-win-win” balance between crop production, farm income and the environment.  
367 The next challenge will be to assess non-market benefits from pollinators to define the value of this  
368 natural capital within a landscape, essential for policy-making and land-use planning.

369

370 **AUTHORSHIP:** VB and SG designed the study. FV carried out the farm survey. RC and SG performed  
371 the analysis, with help from TP and VB. RC and TP wrote the first draft of the manuscript, and VB and  
372 SG contributed substantially to revisions and editing. All authors gave their final approval for  
373 publication.

374 **COMPETING INTERESTS:** We have no competing interests

375 **DATA ACCESSIBILITY:** Upon acceptance of the manuscript, we agree to archive the data in an  
376 appropriate public repository.

377

378 **ACKNOWLEDGEMENTS:** We would like to express our thanks to Marilyne Roncoroni, Jean-Luc  
379 Gautier, Alexis Saintilan and Anthony Stoquert for their help with pollinator trapping and identification.  
380 We sincerely thank the farmers of the LTSER “Zone Atelier Plaine & Val de Sèvre” for their  
381 involvement on our research programs.

382

383 **FUNDING:** This project was supported by the ANR AGROBIOSPHERE AGROBIOSE (2013-AGRO-  
384 001), the SUDOE Intereg POLE-OGI project, the French Ministry of Ecology project (2017-2020  
385 “Pollinisateurs”) and the 2013–2014 BiodivERsA/FACCE-JPI joint call for research proposals (project  
386 ECODEAL), with the national funders ANR, BMBF, FORMAS, FWF, MINECO, NWO and PT-DLR.  
387 RC was supported by ANR AGROBIOSPHERE AGROBIOSE and SUDOE projects. TP was supported



388 by INRA (Meta program ECOSERV) and ANR AGROBIOSE PhD grant. SG and VB are funded by  
389 INRA and CNRS, respectively.

390 **REFERENCES**

- 391 1. Godfray HCJ, Garnett T. 2014 Food security and sustainable intensification. *Philos. Trans. R.*  
392 *Soc. B Biol. Sci.* **369**.
- 393 2. Barnosky AD *et al.* 2012 Approaching a state shift in Earth's biosphere. *Nature* **486**, 52–58.  
394 (doi:10.1038/nature11018)
- 395 3. Vitousek PM *et al.* 2009 Nutrient Imbalances in Agricultural Development. *Science (80-. )*. **324**,  
396 1519 LP-1520.
- 397 4. Gaba S, Gabriel E, Chadœuf J, Bonneu F, Bretagnolle V. 2016 Herbicides do not ensure for  
398 higher wheat yield , but eliminate rare plant species. *Sci. Rep.* , 1–10. (doi:10.1038/srep30112)
- 399 5. Sandhu H, Waterhouse B, Boyer S, Wratten S. 2016 Scarcity of ecosystem services: an  
400 experimental manipulation of declining pollination rates and its economic consequences for  
401 agriculture. *PeerJ* **4**, e2099. (doi:10.7717/peerj.2099)
- 402 6. Titttonell P. 2014 Ecological intensification of agriculture — sustainable by nature. *Curr. Opin.*  
403 *Environ. Sustain.* **8**, 53–61. (doi:http://doi.org/10.1016/j.cosust.2014.08.006)
- 404 7. EC. 2015 Towards an EU Research and Innovation policy agenda for nature-based solutions &  
405 re-naturing cities. *Final Rep. Horiz. 2020 Expert Gr. 'Nature-Based Solut. Re-Naturing Cities'*.  
406 (doi:10.2777/765301)
- 407 8. Altieri MA. 1983 *Agroecology: the scientific basis of alternative agriculture*. Altieri, M. CRC  
408 Press.
- 409 9. Klein A-M, Vaissière BE, Cane JH, Steffan-Dewenter I, Cunningham SA, Kremen C, Tscharntke  
410 T. 2007 Importance of pollinators in changing landscapes for world crops. *Proc. Biol. Sci.* **274**,  
411 66, 95–96, 191. (doi:10.1098/rspb.2006.3721)
- 412 10. Potts SG *et al.* 2016 Safeguarding pollinators and their values to human well-being. *Nature* **540**,  
413 220–229. (doi:10.1038/nature20588)
- 414 11. Garibaldi LA, Aizen MA, Cunningham S, Klein AM. 2009 Pollinator shortage and global crop  
415 yield. *Commun. Integr. Biol.* **2**, 37–39. (doi:10.4161/cib.2.1.7425)
- 416 12. Breeze TD *et al.* 2014 Agricultural policies exacerbate honeybee pollination service supply-  
417 demand mismatches across Europe. *PLoS One* **9**. (doi:10.1371/journal.pone.0082996)
- 418 13. Zhang H, Breeze T, Bailey A, Garthwaite D, Harrington R, Potts SG. 2017 Arthropod pest  
419 control for UK oilseed rape - Comparing insecticide efficacies, side effects and alternatives.  
420 *PLoS One* **12**, 1–22. (doi:10.1371/journal.pone.0169475)
- 421 14. Bijanzadeh E, Naderi R, Behpoori A. 2010 Interrelationships between oilseed rape yield and  
422 weeds population under herbicides application. *Aust. J. Crop Sci.* **4**, 155–162.
- 423 15. Wang L, Liu Q, Dong X, Liu Y, Lu J. 2019 Herbicide and nitrogen rate effects on weed  
424 suppression, N uptake, use efficiency and yield in winter oilseed rape (*Brassica napus* L.). *Glob.*  
425 *Ecol. Conserv.* **17**, e00529. (doi:https://doi.org/10.1016/j.gecco.2019.e00529)
- 426 16. Henry M, Béguin M, Requier F, Rollin O, Odoux J, Aupinel P, Aptel J, Tchamitchian S,  
427 Decourtye A. 2012 A common pesticide devreases foraging success and survival in Honey Bees.  
428 *Science (80-. )*. **336**, 348–350. (doi:10.1126/science.1215039)
- 429 17. Stanley DA, Garratt MPD, Wickens JB, Wickens VJ, Potts SG, Raine NE. 2015 Neonicotinoid  
430 pesticide exposure impairs crop pollination services provided by bumblebees. *Nature* **528**, 548–  
431 50. (doi:10.1038/nature16167)
- 432 18. Johnson RM, Dahlgren L, Siegfried BD, Ellis MD. 2013 Acaricide, Fungicide and Drug  
433 Interactions in Honey Bees (*Apis mellifera*). *PLoS One* **8**, e54092.
- 434 19. Liao L-H, Wu W-Y, Berenbaum MR. 2017 Behavioral responses of honey bees (*Apis mellifera*)  
435 to natural and synthetic xenobiotics in food. *Sci. Rep.* **7**, 15924. (doi:10.1038/s41598-017-15066-  
436 5)
- 437 20. Norfolk O, Eichhorn MP, Gilbert F. 2016 Flowering ground vegetation benefits wild pollinators  
438 and fruit set of almond within arid smallholder orchards. *Insect Conserv. Divers.* **9**, 236–243.  
439 (doi:10.1111/icad.12162)
- 440 21. Lander TA, Bebbler DP, Choy CTL, Harris SA, Boshier DH. 2011 The Circe Principle Explains  
441 How Resource-Rich Land Can Waylay Pollinators in Fragmented Landscapes. *Curr. Biol.* **21**,  
442 1302–1307. (doi:https://doi.org/10.1016/j.cub.2011.06.045)
- 443 22. Hudewenz A, Pufal G, Bögeholz A-L, Klein A-M. 2014 Cross-pollination benefits differ among  
444 oilseed rape varieties. *J. Agric. Sci.* **152**, 770–778. (doi:10.1017/S0021859613000440)

- 445 23. Bommarco R, Marini L, Vaissière BE. 2012 Insect pollination enhances seed yield, quality, and  
446 market value in oilseed rape. *Oecologia* **169**, 1025–1032. (doi:10.1007/s00442-012-2271-6)
- 447 24. Perrot T, Gaba S, Roncoroni M, Gautier J-L, Bretagnolle V. 2018 Bees increase oilseed rape  
448 yield under real field conditions. *Agric. Ecosyst. Environ.* **266**, 39–48.  
449 (doi:https://doi.org/10.1016/j.agee.2018.07.020)
- 450 25. Stanley DA, Gunning D, Stout JC. 2013 Pollinators and pollination of oilseed rape crops  
451 (Brassica napus L.) in Ireland: Ecological and economic incentives for pollinator conservation.  
452 *J. Insect Conserv.* **17**, 1181–1189. (doi:10.1007/s10841-013-9599-z)
- 453 26. Breeze TD, Gallai N, Garibaldi LA, Li XS. 2016 Economic Measures of Pollination Services:  
454 Shortcomings and Future Directions. *Trends Ecol. Evol.* **31**, 927–939.  
455 (doi:10.1016/j.tree.2016.09.002)
- 456 27. Ouvrard P, Jacquemart A-L. 2018 Agri-environment schemes targeting farmland bird  
457 populations also provide food for pollinating insects. *Agric. For. Entomol.* **20**, 558–574.  
458 (doi:10.1111/afe.12289)
- 459 28. Bartomeus I *et al.* 2014 Contribution of insect pollinators to crop yield and quality varies with  
460 agricultural intensification. *PeerJ* **2**, e328. (doi:10.7717/peerj.328)
- 461 29. Seppelt R, Dormann CF, Eppink F V., Lautenbach S, Schmidt S. 2011 A quantitative review of  
462 ecosystem service studies: Approaches, shortcomings and the road ahead. *J. Appl. Ecol.* **48**, 630–  
463 636. (doi:10.1111/j.1365-2664.2010.01952.x)
- 464 30. Garratt MPD, Bishop J, Degani E, Potts SG, Shaw RF, Shi A, Roy S. 2018 Insect pollination as  
465 an agronomic input: Strategies for oilseed rape production. *J. Appl. Ecol.* **0**. (doi:10.1111/1365-  
466 2664.13153)
- 467 31. Tamburini G, Berti A, Morari F, Marini L. 2016 Degradation of soil fertility can cancel  
468 pollination benefits in sunflower. *Oecologia* **180**, 581–587. (doi:10.1007/s00442-015-3493-1)
- 469 32. Isaacs R, Kirk AK. 2010 Pollination services provided to small and large highbush blueberry  
470 fields by wild and managed bees. *J. Appl. Ecol.* **47**, 841–849. (doi:10.1111/j.1365-  
471 2664.2010.01823.x)
- 472 33. Sutter L, Albrecht M. 2016 Synergistic interactions of ecosystem services: florivorous pest  
473 control boosts crop yield increase through insect pollination. *Proc. R. Soc. B* **283**, 20152529.  
474 (doi:10.1098/rspb.2015.2529)
- 475 34. Marini L, Tamburini G, Petrucco-Toffolo E, Lindström SAM, Zanetti F, Mosca G, Bommarco  
476 R. 2015 Crop management modifies the benefits of insect pollination in oilseed rape. *Agric.  
477 Ecosyst. Environ.* **207**, 61–66. (doi:https://doi.org/10.1016/j.agee.2015.03.027)
- 478 35. Hass AL *et al.* 2018 Landscape configurational heterogeneity by small-scale agriculture, not crop  
479 diversity, maintains pollinators and plant reproduction in western Europe. *Proc. R. Soc. B Biol.  
480 Sci.* **285**.
- 481 36. Zou Y *et al.* 2017 Landscape effects on pollinator communities and pollination services in small-  
482 holder agroecosystems. *Agric. Ecosyst. Environ.* **246**, 109–116.  
483 (doi:10.1016/j.agee.2017.05.035)
- 484 37. Holzschuh A *et al.* 2016 Mass-flowering crops dilute pollinator abundance in agricultural  
485 landscapes across Europe. *Ecol. Lett.* **19**, 1228–1236. (doi:10.1111/ele.12657)
- 486 38. Woodcock BA, Bullock JM, McCracken M, Chapman RE, Ball SL, Edwards ME, Nowakowski  
487 M, Pywell RF. 2016 Spill-over of pest control and pollination services into arable crops. *Agric.  
488 Ecosyst. Environ.* **231**, 15–23. (doi:10.1016/j.agee.2016.06.023)
- 489 39. Zurbuchen A, Landert L, Klaiber J, Müller A, Hein S, Dorn S. 2010 Maximum foraging ranges  
490 in solitary bees: only few individuals have the capability to cover long foraging distances. *Biol.  
491 Conserv.* **143**, 669–676. (doi:10.1016/j.biocon.2009.12.003)
- 492 40. Lindström SAM, Herbertsson L, Rundlöf M, Smith HG, Bommarco R. 2016 Large-scale  
493 pollination experiment demonstrates the importance of insect pollination in winter oilseed rape.  
494 *Oecologia* **180**, 759–769. (doi:10.1007/s00442-015-3517-x)
- 495 41. Lindström SAM, Klatt BK, Smith HG, Bommarco R. 2018 Crop management affects pollinator  
496 attractiveness and visitation in oilseed rape. *Basic Appl. Ecol.* **26**, 82–88.  
497 (doi:https://doi.org/10.1016/j.baae.2017.09.005)
- 498 42. Hanley N, Breeze TD, Ellis C, Goulson D. 2015 Measuring the economic value of pollination  
499 services: Principles, evidence and knowledge gaps. *Ecosyst. Serv.* **14**, 124–132.

- 500 (doi:10.1016/j.ecoser.2014.09.013)
- 501 43. Bretagnolle V *et al.* 2018 Description of long-term monitoring of farmland biodiversity in a  
502 LTSER. *Data Br.* **19**, 1310–1313. (doi:<https://doi.org/10.1016/j.dib.2018.05.028>)
- 503 44. Bretagnolle V *et al.* 2018 Towards sustainable and multifunctional agriculture in farmland  
504 landscapes: Lessons from the integrative approach of a French LTSER platform. *Sci. Total*  
505 *Environ.* **627**, 822–834. (doi:<https://doi.org/10.1016/j.scitotenv.2018.01.142>)
- 506 45. Witte RS, Witte JS. 2010 *Statistics*. ninth. J. Wiley & Sons.
- 507 46. Coll M, Wajnberg E. 2017 *Environmental Pest Management: Challenges for Agronomists,*  
508 *Ecologists, Economists and Policymakers*. John Wiley & Sons.
- 509 47. Kudsk P, Jensen JE. 2014 Experiences with Implementation and Adoption of Integrated Pest  
510 Management in Denmark. In *Integrated Pest Management: Experiences with Implementation,*  
511 *Global Overview, Vol.4* (eds R Peshin, D Pimentel), pp. 467–485. Dordrecht: Springer  
512 Netherlands. (doi:10.1007/978-94-007-7802-3\_19)
- 513 48. Jeuffroy M, Recous S. 1999 Azodyn: a simple model simulating the date of nitrogen deficiency  
514 for decision support in wheat fertilization. *Eur. J. Agron.* **10**, 129–144.
- 515 49. Barton K. 2018 Package ‘MuMIn’. *CRAN. R-projec.* , 1–73. See  
516 <ftp://155.232.191.229/cran/web/packages/MuMIn/MuMIn.pdf> (accessed on 2 February 2018).
- 517 50. Johnson JB, Omland KS. 2004 Model selection in ecology and evolution. *Trends Ecol. Evol.* **19**,  
518 101–108. (doi:<https://doi.org/10.1016/j.tree.2003.10.013>)
- 519 51. Lundin O, Rundlöf M, Smith HG, Bommarco R. 2012 Towards integrated pest management in  
520 red clover seed production. *J. Econ. Entomol.* **105**, 1620–1628.
- 521 52. Pywell RF, Heard MS, Woodcock BA, Hinsley S, Ridding L, Nowakowski M, Bullock JM. 2015  
522 Wild-life friendly farming increases crop yield: evidence for ecological intensification. *Proc. R.*  
523 *Soc. London. Ser. B, Biol. Sci.* **282**, 20151740. (doi:10.1098/rspb.2015.1740)
- 524 53. Bommarco R, Kleijn D, Potts SG. 2013 Ecological intensification: Harnessing ecosystem  
525 services for food security. *Trends Ecol. Evol.* **28**, 230–238. (doi:10.1016/j.tree.2012.10.012)
- 526 54. Maes J, Jacobs S. 2015 Nature-Based Solutions for Europe’s Sustainable Development. *Conserv.*  
527 *Letts.* **10**, 121–124. (doi:10.1111/conl.12216)
- 528 55. Tamburini G, Lami F, Marini L. 2017 Pollination benefits are maximized at intermediate nutrient  
529 levels. *Proc. R. Soc. B Biol. Sci.* **284**.
- 530 56. Łukowiak R, Grzebisz W, Sassenrath GF. 2016 New insights into phosphorus management in  
531 agriculture — A crop rotation approach. *Sci. Total Environ.* **542**, 1062–1077.  
532 (doi:<https://doi.org/10.1016/j.scitotenv.2015.09.009>)
- 533 57. Ijaz M, Mahmood K, Honermeier B. 2015 Interactive Role of Fungicides and Plant Growth  
534 Regulator (Trinexapac) on Seed Yield and Oil Quality of Winter Rapeseed. *Agronomy* **5**, 435–  
535 446. (doi:10.3390/agronomy5030435)
- 536 58. Rose TJ, Rengel Z, Ma Q, Bowden JW. 2008 Post-flowering supply of P, but not K, is required  
537 for maximum canola seed yields. *Eur. J. Agron.* **28**, 371–379. (doi:10.1016/j.eja.2007.11.003)
- 538 59. Stahl A, Pfeifer M, Frisch M, Wittkop B, Snowdon RJ. 2017 Recent Genetic Gains in Nitrogen  
539 Use Efficiency in Oilseed Rape. *Front. Plant Sci.* , **8**, 963.
- 540 60. Colnenne C, Meynard JM, Roche R, Reau R. 2002 Effects of nitrogen deficiencies on autumnal  
541 growth of oilseed rape. *Eur. J. Agron.* **17**, 11–28. (doi:[https://doi.org/10.1016/S1161-0301\(01\)00140-X](https://doi.org/10.1016/S1161-0301(01)00140-X))
- 542
- 543 61. Ozturk O. 2010 Effects of source and rate of nitrogen fertilizer on yield, yield components and  
544 quality of winter rapeseed (*Brassica napus* L.). *Chil. J. Agric. Res.* **70**, 132–141.
- 545 62. Cheema MA, Malik MA, Hussain A, Shah SH, Basra SMA. 2001 Effects of time and rate of  
546 nitrogen and phosphorus application on the growth and the seed and oil yields of canola (*Brassica*  
547 *napus* L.). *J. Agron. Crop Sci.* **186**, 103–110. (doi:10.1046/j.1439-037X.2001.00463.x)
- 548 63. Rucker RR, Thurman WN, Burgett M. 2012 Honey Bee Pollination Markets and the  
549 Internalization of Reciprocal Benefits. *Am. J. Agric. Econ.* **94**, 956–977.  
550 (doi:10.1093/ajae/aas031)
- 551 64. Gagic V *et al.* 2017 Combined effects of agrochemicals and ecosystem services on crop yield  
552 across Europe. *Ecol. Lett.* **20**, 1427–1436. (doi:10.1111/ele.12850)
- 553 65. Glamann J, Hanspach J, Abson DJ, Collier N, Fischer J. 2017 The intersection of food security  
554 and biodiversity conservation: a review. *Reg. Environ. Chang.* **17**, 1303–1313.

- 555 (doi:10.1007/s10113-015-0873-3)  
556 66. Popp J, Petó K, Nagy J. 2013 Pesticide productivity and food security. A review. *Agron. Sustain.*  
557 *Dev.* **33**, 243–255. (doi:10.1007/s13593-012-0105-x)  
558 67. Hiiesaar K, Metspalu L, Lääniste P, Jõgar K, Kuusik A, Jõudu J. 2003 Insect pests on winter  
559 oilseed rape studied by different catching methods. *Agron. Res.* **1**, 17–29.  
560 68. Veromann E, Tarang T, Kevvää R, Luik A, Williams I. 2006 Insect pests and their natural  
561 enemies on spring oilseed rape in Estonia: impact of cropping systems.  
562 69. Gagic V, Riggi LGA, Ekbom B, Malsher G, Rusch A, Bommarco R. 2016 Interactive effects of  
563 pests increase seed yield. *Ecol. Evol.* **6**, 2149–2157. (doi:10.1002/ece3.2003)  
564 70. Lechenet M, Dessaint F, Py G, Makowski D, Munier-Jolain N. 2017 Reducing pesticide use  
565 while preserving crop productivity and profitability on arable farms. *Nat. Plants* **3**, 17008.  
566 71. Rader R *et al.* 2015 Non-bee insects are important contributors to global crop pollination. *Proc.*  
567 *Natl. Acad. Sci.* , 201517092. (doi:10.1073/pnas.1517092112)  
568 72. Rollin O, Bretagnolle V, Fortel L, Guilbaud L, Henry M. 2015 Habitat, spatial and temporal  
569 drivers of diversity patterns in a wild bee assemblage. *Biodivers. Conserv.* **24**, 1195–1214.  
570 (doi:10.1007/s10531-014-0852-x)  
571

572 **Table 1. Models of yield (a) and gross margin (b) as a function of farming practices and soil type**  
 573 **and their interaction.** Weight (w), estimated coefficient ( $\beta$ ), 95% confidence intervals (CI) and *p*-value  
 574 are given for each explanatory variable for the average yield and GM models.  $\beta$  and CI are not given for  
 575 categorical variables. Significant terms with confidence intervals not including zero are in bold. All  
 576 explanatory variables were centred/reduced before analysis.

577

578 **a) Yield**

|                   | w    | $\beta$ | Lower CI | Upper CI | <i>p</i> -val     |
|-------------------|------|---------|----------|----------|-------------------|
| <b>Fungicides</b> | 0.34 | 0.081   | 0.0143   | 0.1479   | <b>0.0173</b>     |
| <b>Soil type</b>  | 1.00 |         |          |          | <b>&lt;0.0001</b> |

579

580 **b) Gross Margin**

|                             | w    | $\beta$ | Lower CI | Upper CI | <i>p</i> -val     |
|-----------------------------|------|---------|----------|----------|-------------------|
| <b>Nitrogen</b>             | 1.00 | -132.02 | -278.77  | -136.84  | <b>0.0026</b>     |
| Potassium                   | 1.00 | -65.75  | -139.36  | 37.10    | 0.2051            |
| Phosphorus                  | 1.00 | 20.093  | -84.49   | 108.72   | 0.7402            |
| <b>Herbicides</b>           | 1.00 | -79.61  | -126.27  | -66.69   | <b>&lt;0.0001</b> |
| <b>Insecticides</b>         | 1.00 | -30.52  | -63.85   | -6.97    | <b>0.0620</b>     |
| Fungicides                  | 1.00 | -17.86  | -30.93   | 23.03    | 0.2577            |
| <b>Soil type</b>            | 1.00 |         |          |          | <b>&lt;0.0001</b> |
| <b>Nitrogen x Soil type</b> | 1.00 |         |          |          | >0.075            |
| Potassium x Soil type       | 1.00 |         |          |          | >0.40             |
| Phosphorus x Soil type      | 1.00 |         |          |          | >0.35             |

581



582 **Table 2. Models of yield (a), and gross margins (c) as a function of farming practices, soil type,**  
 583 **bee index and interactions, and including landscape variables (c).** Weight (w), estimated coefficient  
 584 ( $\beta$ ), 95% confidence intervals (CI), and *p*-value are given for each explanatory variable for the averaged  
 585 yield and GM.  $\beta$  and CI are not given for the categorical variables. Significant terms with confidence  
 586 intervals not including zero are in bold. All explanatory variables were centred/reduced before analysis.  
 587 Bees represents the bee index, i.e sum of honeybee and *Lasioglossum* spp. abundances.

588

**a) Yield**

|                            | <b>w</b> | <b><math>\beta</math></b> | <b>Lower CI</b> | <b>Upper CI</b> | <b><i>p</i>-val</b> |
|----------------------------|----------|---------------------------|-----------------|-----------------|---------------------|
| <b>Bees</b>                | 1.00     | 0.068                     | 0.0081          | 0.1288          | <b>0.0262</b>       |
| Nitrogen                   | 0.07     | 0.038                     | -0.0824         | 0.1576          | 0.5388              |
| Phosphorus                 | 0.43     | 0.102                     | -0.0322         | 0.2363          | 0.1363              |
| Potassium                  | 0.24     | -0.070                    | -0.1913         | 0.0522          | 0.2625              |
| <b>Fungicides</b>          | 0.84     | 0.129                     | 0.0063          | 0.2525          | <b>0.0394</b>       |
| Insecticides               | 0.55     | 0.047                     | -0.0682         | 0.1626          | 0.4231              |
| <b>Bees x Insecticides</b> | 0.55     | -0.054                    | -0.1035         | -0.0047         | <b>0.0318</b>       |
| Bees x Fungicides          | 0.11     | 0.028                     | -0.0215         | 0.0776          | 0.2665              |

589

590

**b) Yield, including landscape variables**

|                            | <b>w</b> | <b><math>\beta</math></b> | <b>Lower CI</b> | <b>Upper CI</b> | <b><i>p</i>-val</b> |
|----------------------------|----------|---------------------------|-----------------|-----------------|---------------------|
| <b>Bees</b>                | 1.00     | 0.077                     | -0.020          | 0.215           | <b>0.0061</b>       |
| Phosphorus                 | 0.37     | 0.103                     | -0.026          | 0.231           | 0.1172              |
| Potassium                  | 0.12     | -0.073                    | -0.070          | 0.161           | 0.2296              |
| <b>Fungicides</b>          | 0.88     | 0.131                     | 0.022           | 0.131           | <b>0.0305</b>       |
| Insecticides               | 0.23     | 0.036                     | -0.079          | 0.151           | 0.5406              |
| %OSR                       | 0.95     | 0.097                     | 0.012           | 0.250           | 0.1044              |
| %SNH                       | 0.17     | 0.045                     | -0.193          | 0.462           | 0.4424              |
| <b>Bees x Insecticides</b> | 0.23     | -0.047                    | -0.093          | -0.954          | <b>0.0495</b>       |
| Bees x %SNH                | 0.05     | -0.038                    | -0.089          | 0.014           | 0.1500              |
| Bees x %OSR                | 0.63     | -0.052                    | -0.112          | 0.009           | 0.0937              |

591

592

**c) Gross margin**

|                     | <b>w</b> | <b><math>\beta</math></b> | <b>Lower CI</b> | <b>Upper CI</b> | <b><i>p</i>-val</b> |
|---------------------|----------|---------------------------|-----------------|-----------------|---------------------|
| <b>Bees</b>         | 1.00     | 23.95                     | 1.319           | 46.582          | <b>0.0381</b>       |
| Nitrogen            | 0.16     | -20.60                    | -35.714         | 4.619           | 0.4524              |
| <b>Potassium</b>    | 1.00     | -69.80                    | -119.943        | -19.647         | <b>0.0064</b>       |
| <b>Herbicides</b>   | 1.00     | -107.58                   | -157.332        | -57.836         | <b>&lt;0.0001</b>   |
| Insecticides        | 0.25     | -20.43                    | -12.615         | 39.125          | 0.4310              |
| Bees x Herbicides   | 0.46     | -16.27                    | -37.733         | 5.200           | 0.1375              |
| Bees x Insecticides | 0.09     | -15.55                    | -74.317         | 33.124          | 0.1308              |
| Bees x Potassium    | 0.20     | 13.25                     | -71.288         | 30.419          | 0.3153              |
